# Supplementary material for: Robust charge carrier engineering via plasmonic effect and conjugated Π-framework on Au loaded ZnCr-LDH/RGO photocatalyst towards H2 and H2O2 production
Source: Royal Society of Chemistry journal article supplement (doi:10.1039/d1qi01284c), 2022-01-01
Supplement: d1qi01284c1.pdf [file d1qi01284c1.pdf]

**Electronic Supportive Information**

**Robust Charge Carrier Engineering Via Plasmonic effect and Conjugated II-Framework  
on Au loaded ZnCr-LDH/RGO Photocatalyst towards H<sub>2</sub> and H<sub>2</sub>O<sub>2</sub> Production**

**Sriram Mansingh<sup>#</sup>, Dipti Prava Sahoo<sup>#</sup>, Lekha Paramanik, Mitarani Sahoo and Kulamani  
Parida\***

Centre for Nano Science and Nano Technology, Siksha 'O' Anusandhan (Deemed to be  
University), Bhubaneswar-751030, Odisha, India

---

\* Corresponding author

E-mail: [paridakulamani@yahoo.com](mailto:paridakulamani@yahoo.com),

[kulamaniparida@soa.ac.in](mailto:kulamaniparida@soa.ac.in)

**S1. Calculation of Number of H<sub>2</sub> evolved (theoretical) and apparent conversion efficiency (ACE).**

(a) Number of H<sub>2</sub> molecules generated over Au@LDH/RGO composite was calculated by the reported literature of Deka *et al.*: [3]

Number of H<sub>2</sub> produced from Au@LDH/RGO composite:

Volume of H<sub>2</sub> generated during the reaction period = 20.6 ml = 0.0206 L

Form standard gas equation, we have **PV= nRT**

n (no. of H<sub>2</sub> gas evolved) = 0.0206 L x 1 atm / 0.082 L.atm mol<sup>-1</sup> K<sup>-1</sup> x 298 K

The corresponding amount of hydrogen in moles/2h = 0.000843 moles/2h

As we know, 1 mole of H<sub>2</sub> gas = 6.023 x 10<sup>23</sup> molecules of H<sub>2</sub>

Therefore, 0.000843 moles = 6.023x 10<sup>23</sup> x 0.000843 H<sub>2</sub> molecules

H<sub>2</sub> molecule (*per cm<sup>2</sup> per s*) = (6.023 x 10<sup>23</sup> x 0.000843) / (14.13 x 2 h x 60 min x 60 s)

= **4.9903 x 10<sup>15</sup> cm<sup>-2</sup>s<sup>-1</sup>**

Number of H<sub>2</sub> molecule (*per s*) = (6.023 \* 10<sup>23</sup> \* 0.000843) / (2 h x 60 min x 60 s)

= **7.0513 x 10<sup>16</sup> s<sup>-1</sup>**

(b) Apparent conversion efficiency (ACE) of Au@LDH/RGO hybrid for H<sub>2</sub> production (918.76 μmol/2h in methanol solution) under 125W Hg lamp irradiation was calculated by following the below given formula. [2]

$$\Rightarrow \text{ACE} = \frac{\text{Stored chemical energy (SCE)}}{\text{Incident photon intensity (IPI)}}$$

SCE= Number of H<sub>2</sub> generated (moles /sec) \* Heat of combustion of H<sub>2</sub> (kJ/mole)

= 0.127 \* 10<sup>-6</sup> mole/sec \* 285.8 \* 10<sup>3</sup>J/mole

=0.0362 W

**IPI**= Intensity of 125 W Hg lamp \* Distance between lamp and reaction suspension surface \*  
spherical surface area on which light is irradiated ( $2\pi r$ )

$$= 0.027 \times 9 \times 2 \times 3.14 \times (1.5)^2$$

$$= 0.3433W$$

$$\Rightarrow \text{ACE} = \frac{SCE}{ILI}$$

$$\Rightarrow \frac{0.0362W}{0.3433W} = 10.5\%$$

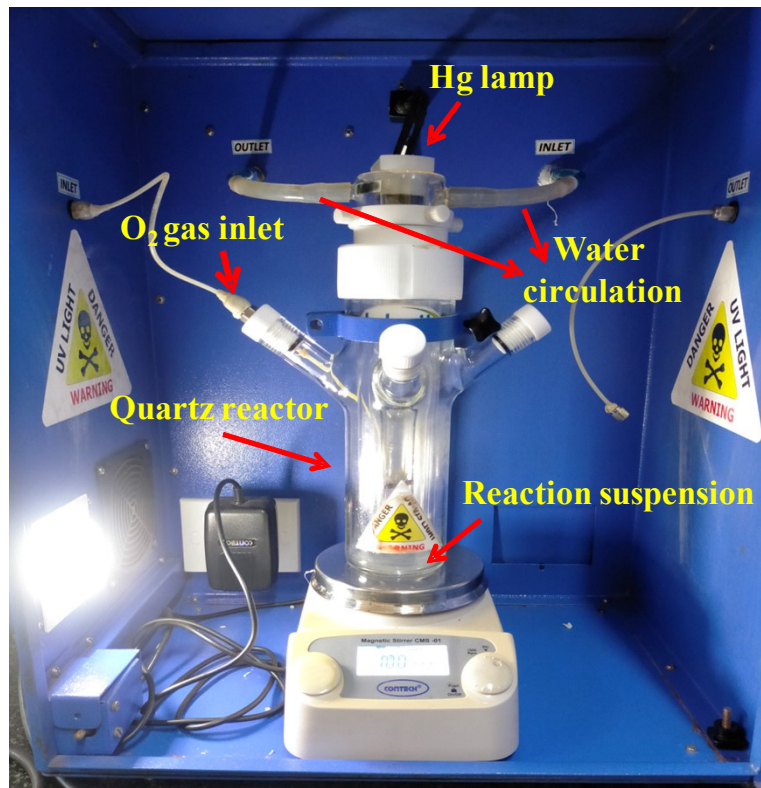

**Fig. S2** Picture of photoreactor for H<sub>2</sub>O<sub>2</sub> generation.

### **S3. Calculation of solar to chemical conversion efficiency (SCC %).**

Solar to chemical conversion efficiency (SCC %) of Au@LDH/RGO composite towards H<sub>2</sub>O<sub>2</sub> production under 250 W Hg lamp was calculated by following the below mention equation:

$$\text{SCC \%} = \frac{([\Delta G^\circ \text{ for } H_2O_2 \text{ production (J/mol)}] \times [H_2O_2 \text{ formed (mol)}])}{([\text{Input energy (W)}] \times [\text{reaction time(s)}])} \times$$

100

Input energy = Intensity of used Hg lamp × Distance of lamp from catalyst mixed solution (9 cm)

× Surface area of the spherical region on which light is focused ( $2\pi r$ ,  $r=1.5$  cm)

$$= 1.33 \times 9 \times 2 \times 3.14 \times (1.5)^2$$

$$= 169.13 \text{ W}$$

$$= \frac{117 \times 10^3 \times 24.3 \times 10^{-6}}{169.13 \times 2 \times 3600} \times 100$$

$$= \mathbf{0.23\%}$$

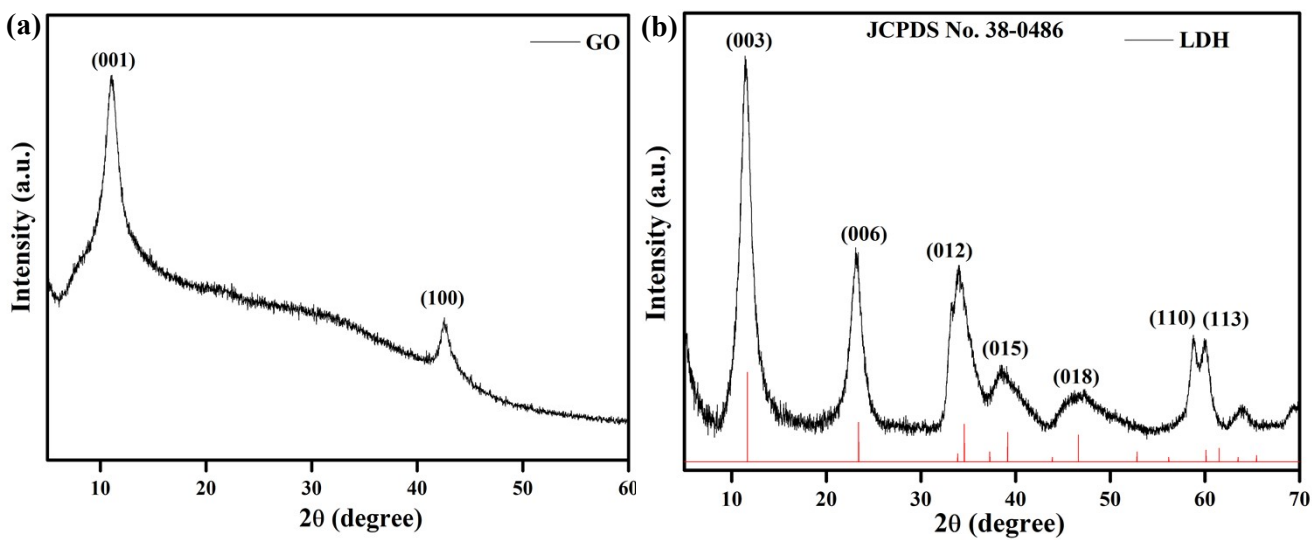

**Fig. S4** XRD pattern of (a) GO and (b) LDH.

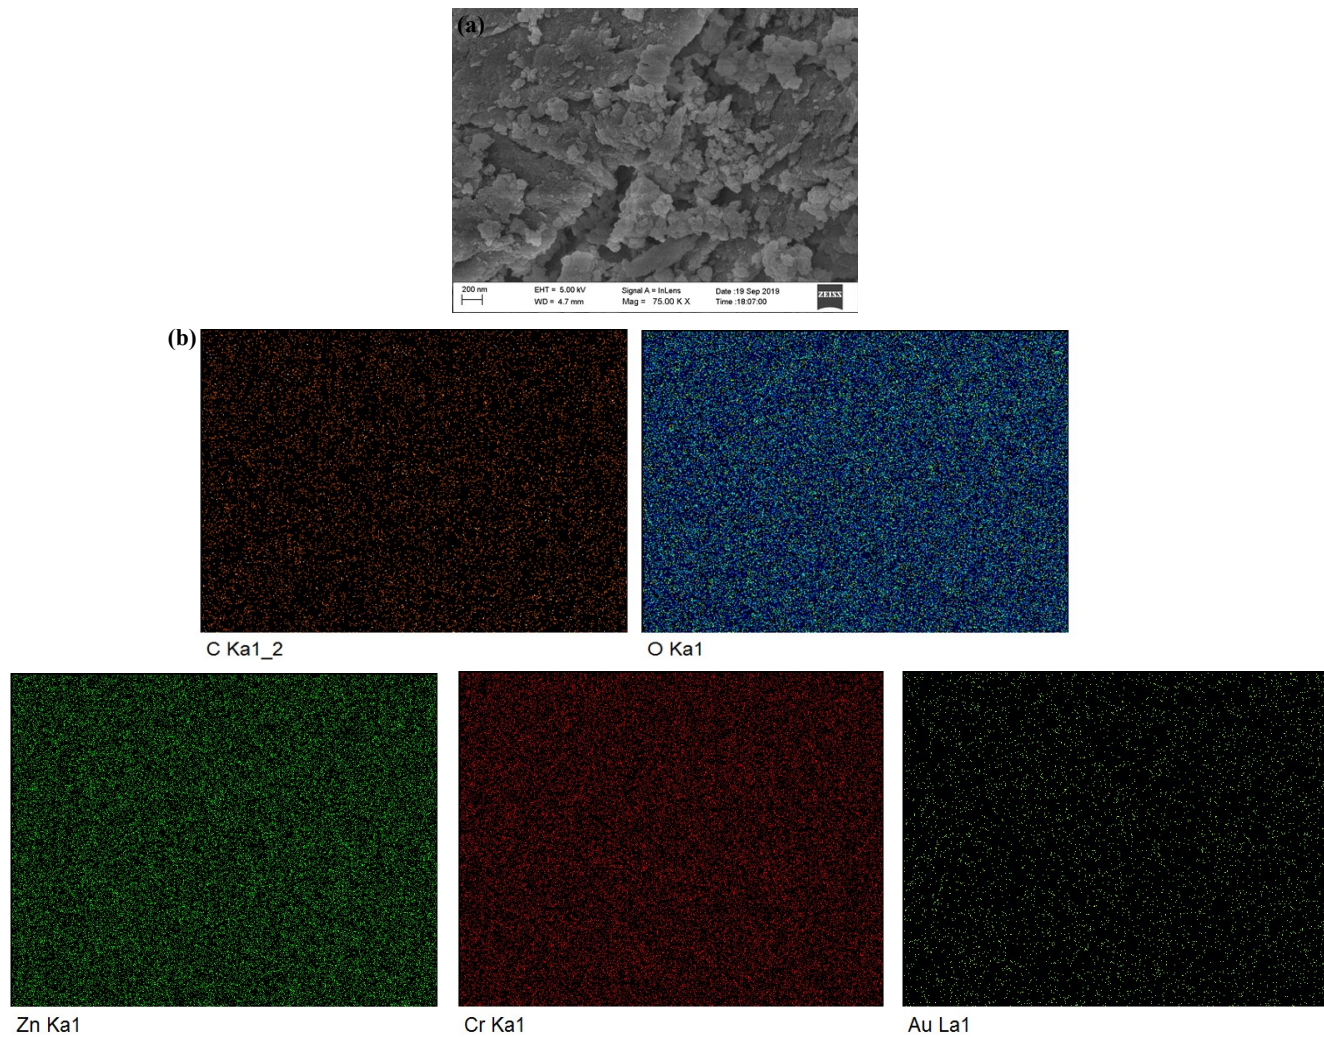

**Fig. S5** (a) FESEM image and (b) colour elemental mapping image of Au@LDH/RGO.

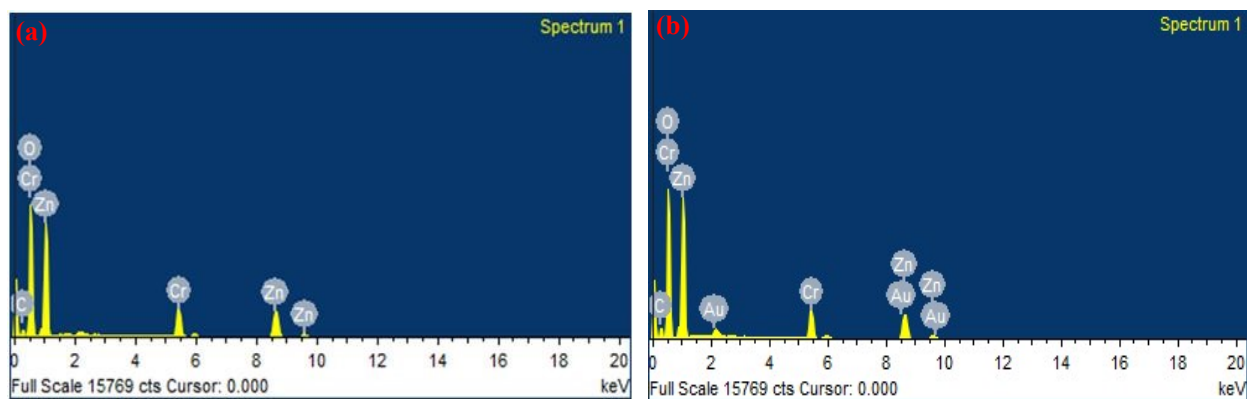

**Fig. S6** EDAX of (a) LDH/RGO and (b) Au@LDH/RGO.

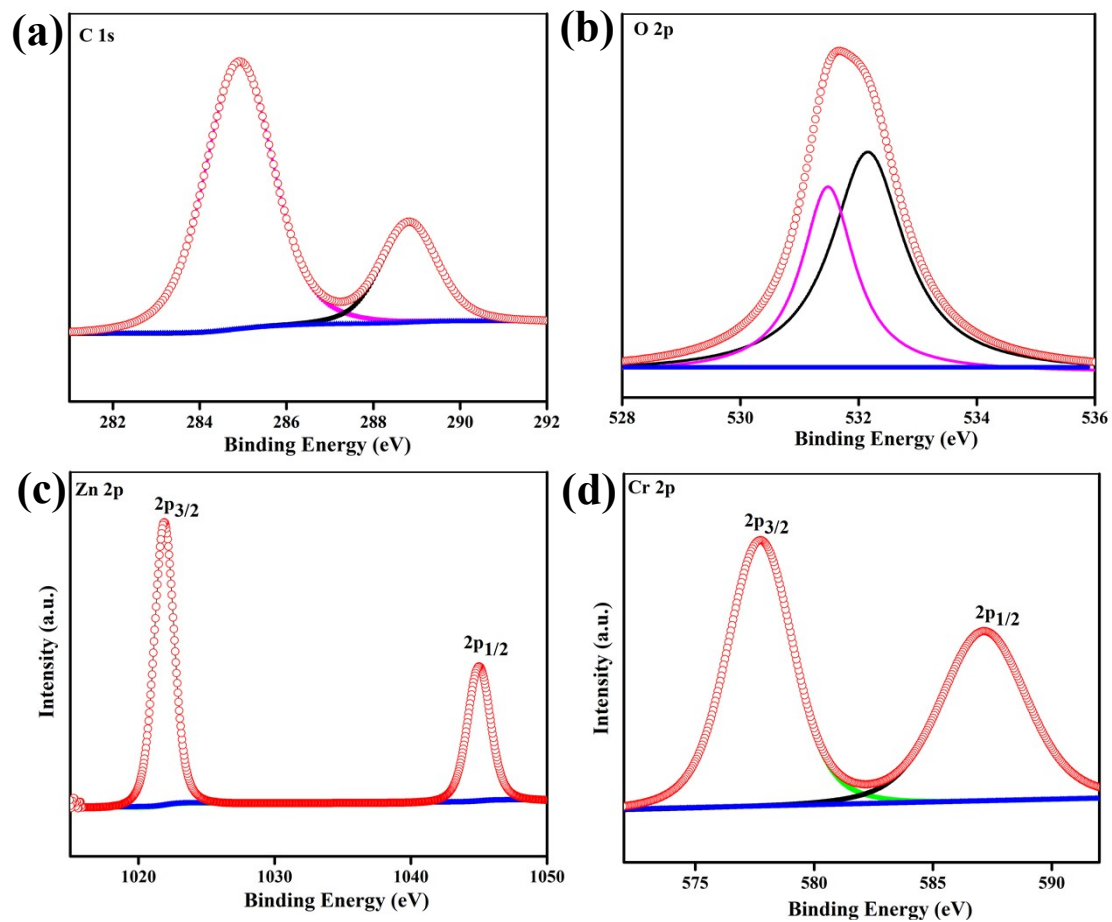

Fig. S7 XPS plot of LDH (a) C 1s, (b) O 1s, (c) Zn 2p and (d) Cr 2p.

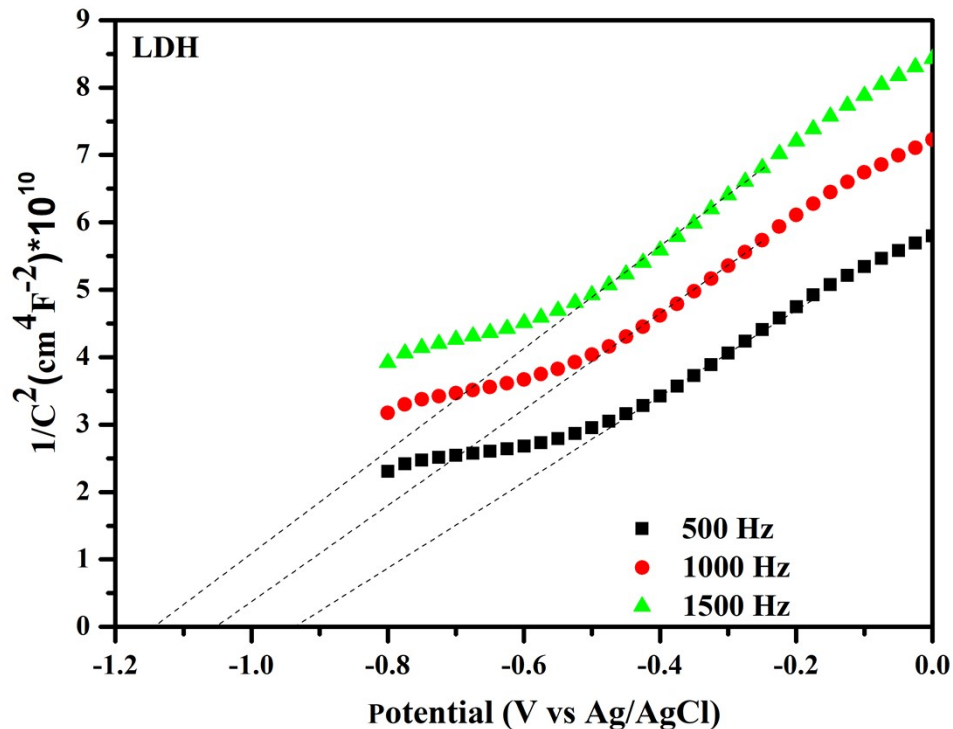

**Fig. S8** Mott-Schottky graph of LDH at different frequency.

**Table S9.** Table represents the comparison study for photocatalytic H<sub>2</sub> evolution over present ternary heterostructure with the reported LDH, RGO and Au based system.

| Photocatalyst                                                             | Light irradiation and sacrificial agents                                       | H <sub>2</sub> evolution (μmolg <sup>-1</sup> h <sup>-1</sup> ) | Ref |
|---------------------------------------------------------------------------|--------------------------------------------------------------------------------|-----------------------------------------------------------------|-----|
| rGO/La <sub>2</sub> Ti <sub>2</sub> O <sub>7</sub> /NiFe-LDH              | simulated solar irradiation, AM 1.5, TEOA                                      | 532.2                                                           | 1   |
| NiAl-LDH/g-C <sub>3</sub> N <sub>4</sub> /Ag <sub>3</sub> PO <sub>4</sub> | 250 W quartz tungsten halogen lamp (λ≥420), CH <sub>3</sub> OH                 | 268                                                             | 2   |
| CdIn <sub>2</sub> S <sub>4</sub> /In(OH) <sub>3</sub> /Ni Cr-LDH          | 300 W Xe lamp (λ≥400), Na <sub>2</sub> S and Na <sub>2</sub> SO <sub>3</sub> . | 1093                                                            | 3   |

|                                                              |                                                                                               |        |                 |
|--------------------------------------------------------------|-----------------------------------------------------------------------------------------------|--------|-----------------|
| Au-Pd/rGO/TiO <sub>2</sub>                                   | 300 W Xe lamp<br>( $\lambda \geq 420$ ), CH <sub>3</sub> OH                                   | 21500  | 4               |
| ZnIn <sub>2</sub> S <sub>4</sub> -rGO-<br>CuInS <sub>2</sub> | 150W Xe lamp,<br>( $\lambda \geq 420$ ),<br>Na <sub>2</sub> S/Na <sub>2</sub> SO <sub>3</sub> | 510    | 5               |
| rGO/CuFe <sub>2</sub> O <sub>4</sub> -TiO <sub>2</sub>       | 250 W Xe lamp,<br>( $\lambda \geq 420$ ), glycerol-<br>water mixture                          | 35981  | 6               |
| InVO <sub>4</sub> -g-C <sub>3</sub> N <sub>4</sub> /rGO      | simulated solar<br>irradiation, AM 1.5,<br>TEOA                                               | 7449   | 7               |
| TiO <sub>2</sub> -Ag-rGO                                     | 280 W Xe lamp,<br>( $\lambda \geq 420$ ), CH <sub>3</sub> OH                                  | 593.56 | 8               |
| Au@LDH/RGO                                                   | 125 W Xe lamp,<br>( $\lambda \geq 420$ ), CH <sub>3</sub> OH                                  | 22950  | Present<br>work |

**Table S10.** Table represents the comparison study for photocatalytic H<sub>2</sub>O<sub>2</sub> evolution over present ternary heterostructure with the reported RGO and Au based system.

| Photocatalyst                             | Light irradiation and<br>sacrificial agents                   | H <sub>2</sub> O <sub>2</sub><br>production | Ref |
|-------------------------------------------|---------------------------------------------------------------|---------------------------------------------|-----|
| CN/rGO@black<br>phosphorus quantum<br>dot | 300 W arc Xe lamp<br>(420 < $\lambda$ < 780 nm)               | 181.69<br>$\mu$ mol/L, 3h                   | 9   |
| CoPi/rGO/TiO <sub>2</sub>                 | 300 W Xe arc lamp<br>( $\lambda \geq 320$ nm), 2-<br>propanol | 850 $\mu$ mol, 3h                           | 10  |
| TiO <sub>2</sub> /rGO/Carbon<br>dots      | simulated solar<br>irradiation AM 1.5,<br>2-propanol          | 350 $\mu$ mol, 1h                           | 11  |



|                                        |                                                |                |              |
|----------------------------------------|------------------------------------------------|----------------|--------------|
| TiO <sub>2</sub> /WO <sub>3</sub> /rGO | simulated solar irradiation AM 1.5, 2-propanol | 270 μmol, 1h   | 12           |
| Au/SnO <sub>2</sub> -TiO <sub>2</sub>  | UV light, alcohol                              | 15000 μmol, 3h | 13           |
| Au@LDH/RGO                             | 125 W Xe lamp, (λ≥420), CH <sub>3</sub> OH     | 24.3 μmol, 2h  | Present Work |

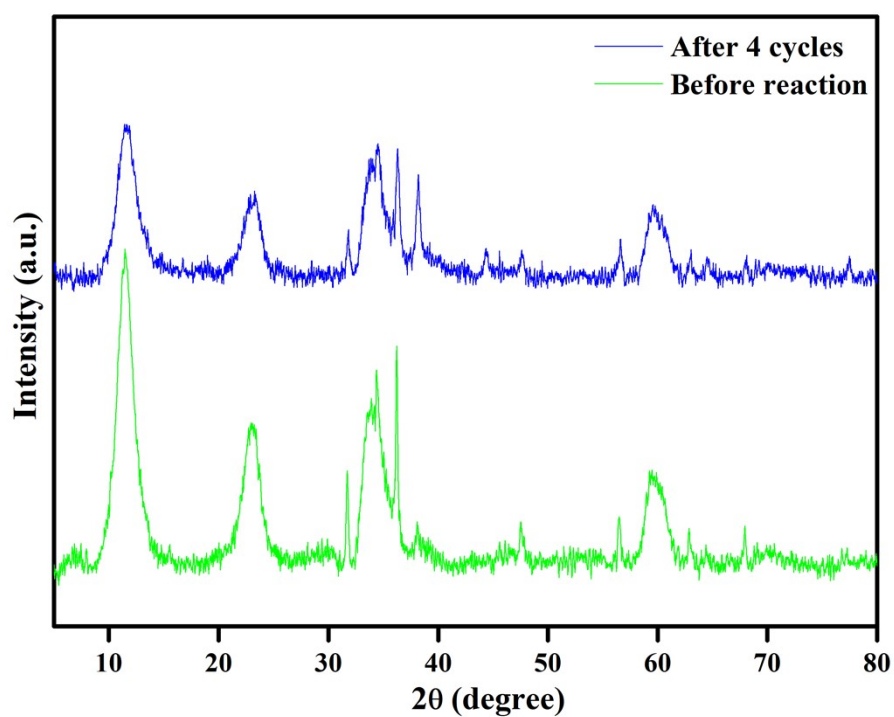

**Fig. S11** XRD plot of Au@LDH/RGO sample after and before use.

## References

1. R. Boppella, C.H. Choi, J. Moon and D.H. Kim, Spatial charge separation on strongly coupled 2D-hybrid of rGO/La<sub>2</sub>Ti<sub>2</sub>O<sub>7</sub>/NiFe-LDH heterostructures for highly efficient noble metal free photocatalytic hydrogen generation. *Appl. Catal. B*, 2018, **239**, 178-186.
2. S. Megala, P. Ravi, P. Maadeswaran, M. Navaneethan, M. Sathish and R. Ramesh, The construction of a dual direct Z-scheme NiAl LDH/gC<sub>3</sub>N<sub>4</sub>/Ag<sub>3</sub>PO<sub>4</sub> nanocomposite for enhanced photocatalytic oxygen and hydrogen evolution. *Nanoscale Adv.*, 2021, **3**, 2075-2088.
3. R. Fu, Y. Gong, C. Li, L. Niu and X. Liu, CdIn<sub>2</sub>S<sub>4</sub>/In (OH)<sub>3</sub>/NiCr-LDH Multi-interface heterostructure photocatalyst for enhanced photocatalytic H<sub>2</sub> evolution and Cr (VI) reduction. *Nanomaterials*, 2021, **11**, 3122.
4. B. Tudu, N. Nalajala, K. P. Reddy, P. Saikia and C.S. Gopinath, Electronic integration and thin film aspects of Au-Pd/rGO/TiO<sub>2</sub> for improved solar hydrogen generation. *ACS Appl. Mater. Interfaces*, 2019, **11**, 32869-32878.
5. A. Raja, N. Son, M. Swaminathan and M. Kang, Facile synthesis of sphere-like structured ZnIn<sub>2</sub>S<sub>4</sub>-rGO-CuInS<sub>2</sub> ternary heterojunction catalyst for efficient visible-active photocatalytic hydrogen evolution. *J. Colloid Interface Sci.*, 2021, **602**, 669-679.
6. H.Y. Hafeez, S.K. Lakhera, P. Karthik, M. Anpo and B. Neppolian, Facile construction of ternary CuFe<sub>2</sub>O<sub>4</sub>-TiO<sub>2</sub> nanocomposite supported reduced graphene oxide (rGO) photocatalysts for the efficient hydrogen production. *Appl. Surf. Sci.*, 2018, **449**, 772-779.
7. H.Y. Hafeez, S.K. Lakhera, M.V. Shankar and B. Neppolian, Synergetic improvement in charge carrier transport and light harvesting over ternary InVO<sub>4</sub>-g-C<sub>3</sub>N<sub>4</sub>/rGO hybrid nanocomposite for hydrogen evolution reaction. *Int. J. Hydrog. Energy*, 2020, **45**, 7530-7540.
8. Z. Wang, Z.X. Low, X. Zeng, B. Su, Y. Yin, C. Sun, T. Williams, H. Wang and X. Zhang, Vertically-heterostructured TiO<sub>2</sub>-Ag-rGO ternary nanocomposite constructed with {001} faceted TiO<sub>2</sub> nanosheets for enhanced Pt-free hydrogen production. *Int. J. Hydrog. Energy*, 2018, **43**, 1508-1515.
9. J. Xiong, X. Li, J. Huang, X. Gao, Z. Chen, J. Liu, H. Li, B. Kang, W. Yao and Y. Zhu, CN/rGO@BPQDs high-low junctions with stretching spatial charge separation ability for photocatalytic degradation and H<sub>2</sub>O<sub>2</sub> production. *Appl. Catal. B*, 2020, **266**, 118602.

10. G.H. Moon, W. Kim, A.D. Bokare, N.E. Sung and W. Choi, Solar production of H<sub>2</sub>O<sub>2</sub> on reduced graphene oxide–TiO<sub>2</sub> hybrid photocatalysts consisting of earth-abundant elements only. *Energy Environ. Sci.*, 2014, **7**, 4023-4028.
11. X. Zeng, Z. Wang, N. Meng, D.T. McCarthy, A. Deletic, J.H. Pan and X. Zhang, Highly dispersed TiO<sub>2</sub> nanocrystals and carbon dots on reduced graphene oxide: Ternary nanocomposites for accelerated photocatalytic water disinfection. *Appl. Catal. B*, 2017, **202**, 33-41.
12. X. Zeng, Z. Wang, G. Wang, T.R. Gengenbach, D.T. McCarthy, A. Deletic, J. Yu and X. Zhang, Highly dispersed TiO<sub>2</sub> nanocrystals and WO<sub>3</sub> nanorods on reduced graphene oxide: Z-scheme photocatalysis system for accelerated photocatalytic water disinfection. *Appl. Catal. B*, 2017, **218**, 163-173.
13. K. Takise, A. Sato, S. Ogo, J.G. Seo, K.I. Imagawa, S. Kado and Y. Sekine, Low-temperature selective catalytic dehydrogenation of methylcyclohexane by surface protonics. *RSC Adv.*, 2019, **9**, 27743-27748.
